# Supplementary material for: Gtpbp2 is a positive regulator of Wnt signaling and maintains low levels of the Wnt negative regulator Axin
Source: PubMed Central journal article supplement (PMC4969687; doi:10.1186/s12964-016-0138-x), 2016-08-02
Supplement: 12964_2016_138_MOESM1_ESM.pdf [file 12964_2016_138_MOESM1_ESM.pdf]

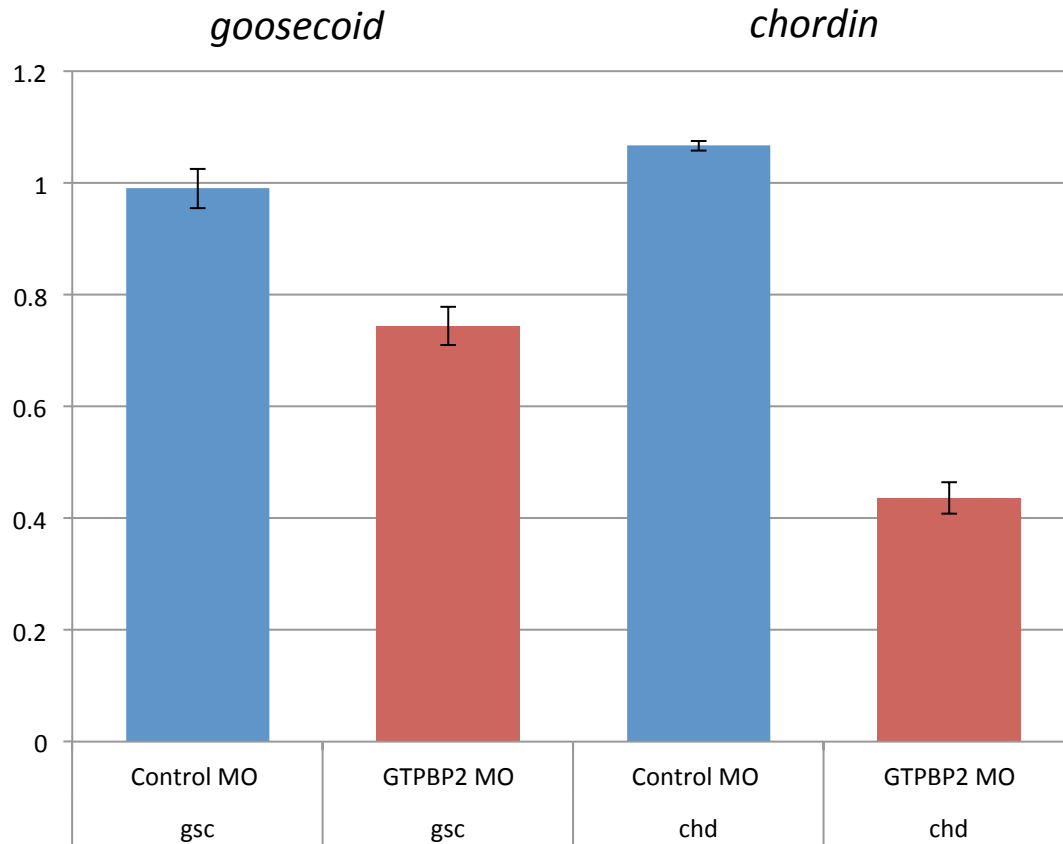

**Additional File 1: GTPBP2 regulates the expression of additional organizer markers.** Embryos injected bilaterally at the 2-cell stage with 15 ng Gtpbp2 (*gtpbp2 mo*) or mismatch control (*co-mo*) morpholino were cultured until stage 10.25 then measured for *nodal3.1*, *siamois*, and *odc* levels. Amounts of *goosecoid* (*gsc*) or *chordin* (*chd*) were normalized to *odc* and relative levels shown as mean  $\pm$  s.e.m of n = 3.
