# Supplementary material for: Gtpbp2 is a positive regulator of Wnt signaling and maintains low levels of the Wnt negative regulator Axin
Source: PubMed Central journal article supplement (PMC4969687; doi:10.1186/s12964-016-0138-x), 2016-08-02
Supplement: 12964_2016_138_MOESM2_ESM.pdf [file 12964_2016_138_MOESM2_ESM.pdf]

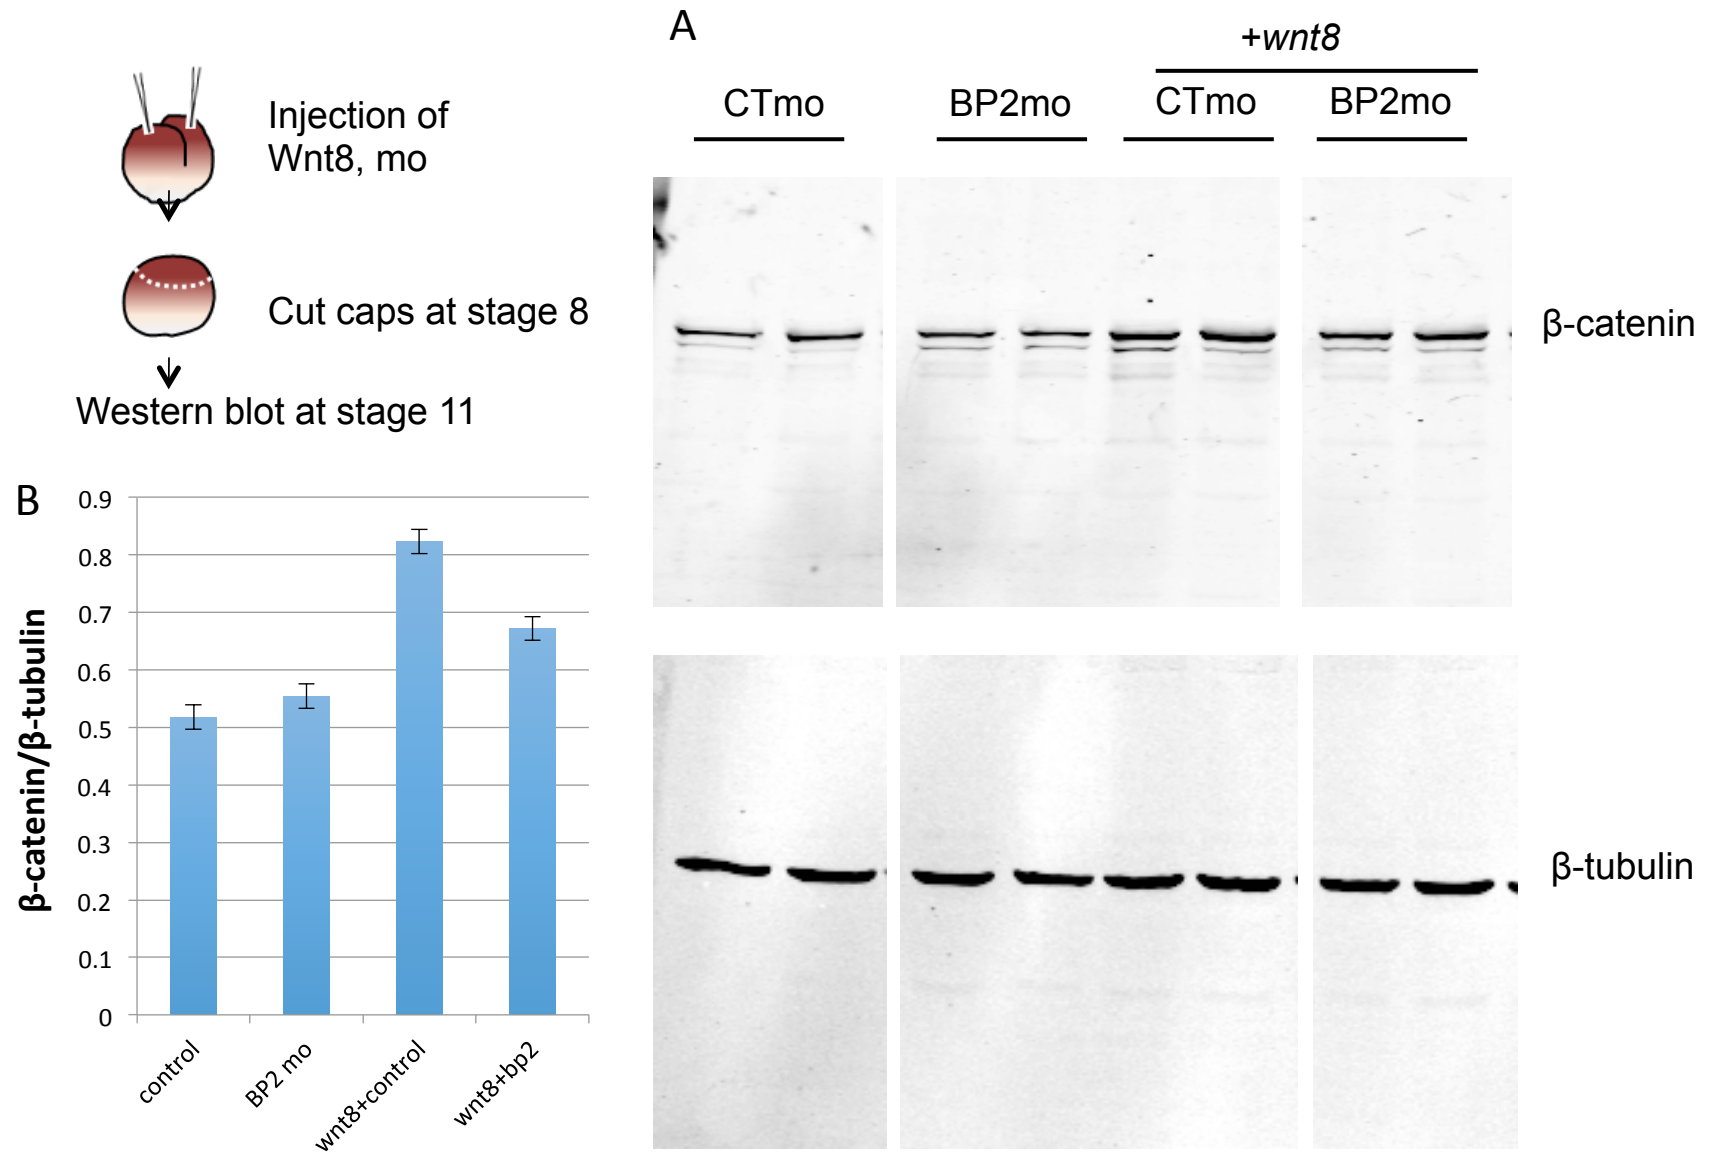

**Additional File 2: Gtppb2 morphants impair β-catenin stabilization in response to *wnt8*:** A) The animal pole of 2-cell *Xenopus* embryos were injected with Gtppb2 morpholino (BP2 mo), Control morpholino (CTmo), and *wnt8* as indicated. Animals caps were cut at stage 8 and cultured until stage 11, and analyzed via western blot for β-catenin and β-tubulin levels. B) Quantitation of relative β-catenin levels shown as mean ± s.e.m of n =2.
