# Supplementary material for: Gtpbp2 is a positive regulator of Wnt signaling and maintains low levels of the Wnt negative regulator Axin
Source: PubMed Central journal article supplement (PMC4969687; doi:10.1186/s12964-016-0138-x), 2016-08-02
Supplement: 12964_2016_138_MOESM3_ESM.pdf [file 12964_2016_138_MOESM3_ESM.pdf]

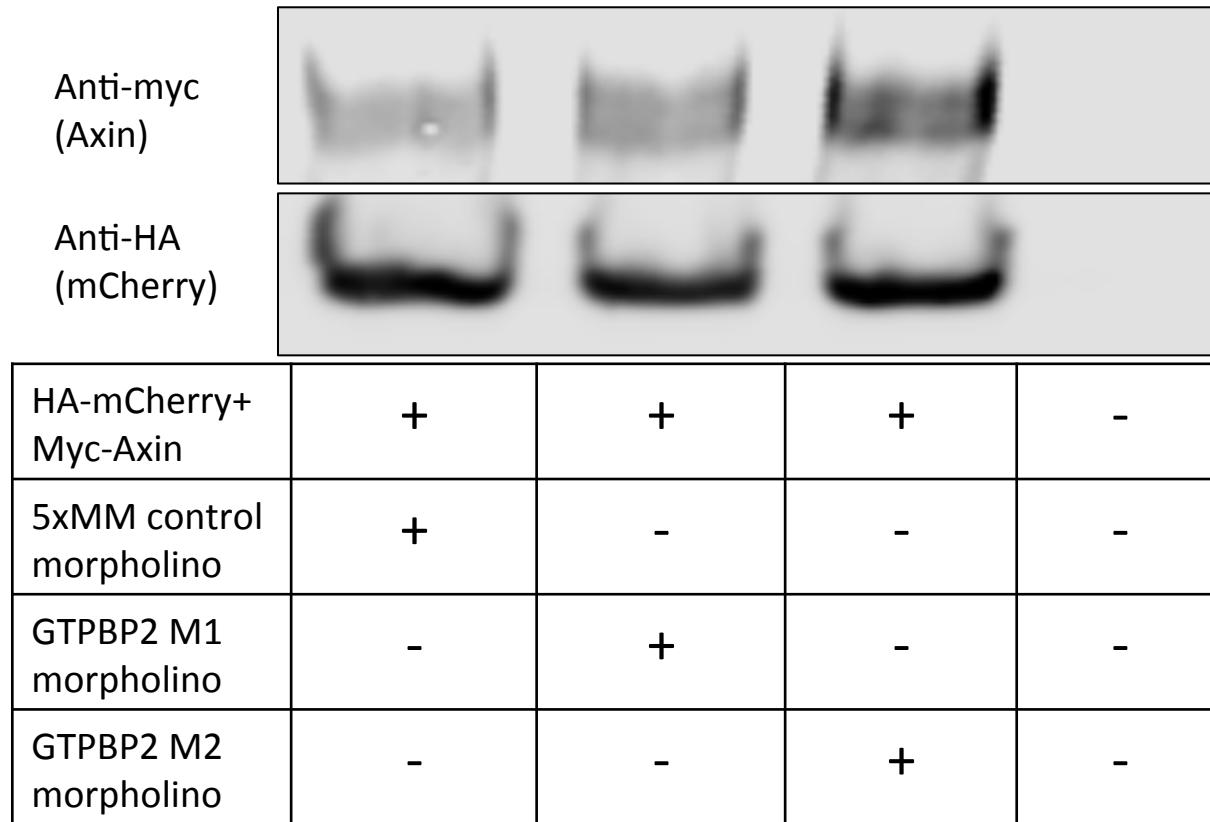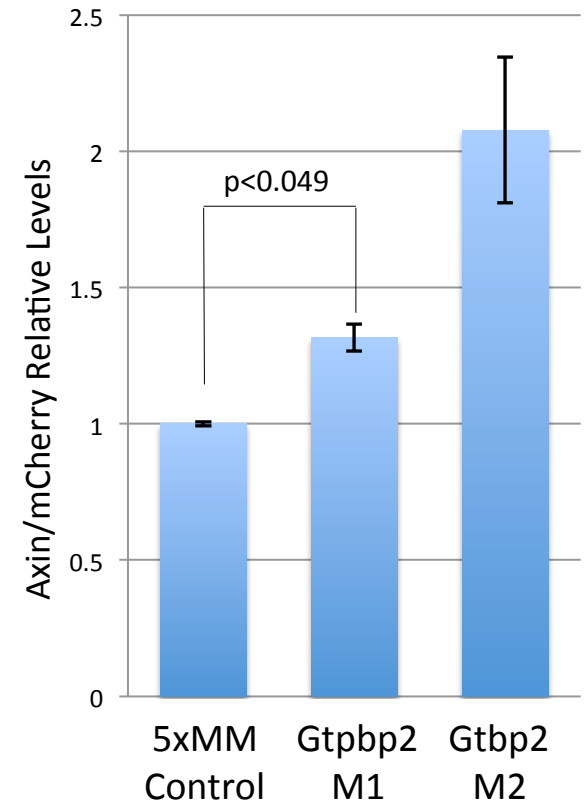

### Additional File 3: Stabilization of Axin occurs with two separate Gtpbp2 morpholinos

A) *HA-mcherry* and *myc-axin* mRNAs were co-injected with mRNAs encoding HA-mCherry (1ng) and myc-Axin (1 ng) and either 5x mismatch (5xMM) control, Gtpbp2 M1, or Gtpbp2 M2 morpholinos (40 ng) at the two cell stage, and tagged proteins were detected via western blot of stage 10.5 protein lysates. B) Quantitation of relative myc-Axin levels shown as mean  $\pm$  s.e.m of  $n=4$ .
